# Supplementary material
Source: PubMed Central journal article supplement (PMC11477816)
Supplement: ajcr0014-4378-f7.pdf [file ajcr0014-4378-f7.pdf]

## Involvement of Zeb1-Cxcl1 axis in breast cancer immune escape

**Table S1.** Primer sequences and shRNA used in this study

| Gene                       | Primer (5'-3')        |                          |
|----------------------------|-----------------------|--------------------------|
| mCD206                     | Forward               | ACGCAGTGGTTGGCAGTGGG     |
|                            | Reverse               | TTGCCAGGTCCCCACCCTCC     |
| mArg1                      | Forward               | CAGTCTGGCAGTTGGAAGC      |
|                            | Reverse               | TTGGCAGATATGCAGGGAG      |
| mCCL22                     | Forward               | CAGGCAGGTCTGGGTGAA       |
|                            | Reverse               | TAAAGGTGGCGTCGTTGG       |
| mIL10                      | Forward               | CAACATACTGCTAACCGACTC    |
|                            | Reverse               | CATGGCCTGTAGACACCT       |
| mTNF $\alpha$              | Forward               | CCTCTTCTCATTCTGCTTG      |
|                            | Reverse               | CACTTGGTGGTTTGCTACG      |
| mIL1 $\beta$               | Forward               | ATCCAGCTTCAATCTCGC       |
|                            | Reverse               | ATCTCGGAGCCTGTAGTGC      |
| hCD206                     | Forward               | GGGTTGCTATCACTCTCTATGC   |
|                            | Reverse               | TTTCTTGCTGTTGCCGTAGTT    |
| hMMP9                      | Forward               | ATGCGTGGAGAGTCGAAATC     |
|                            | Reverse               | TACACGCGAGTGAAGGTGAG     |
| hIL10                      | Forward               | GGTTGCCAAGCCTTGCTGA      |
|                            | Reverse               | GGGAGTTCACATGCGCCT       |
| hArg1                      | Forward               | ACCATAGGGATTATTGGAGC     |
|                            | Reverse               | TGTCATTAGGGATGTCAGCA     |
| hCCL22                     | Forward               | AGCCAATGAAGAGCCTAC       |
|                            | Reverse               | GCAGAGGATGGGTTAGAG       |
| hTNF $\alpha$              | Forward               | CGAGTGACAAGCCTGTAGCC     |
|                            | Reverse               | TGAAGAGGACCTGGGAGTAGAT   |
| hIL1 $\beta$               | Forward               | GCTTATTACAGTGGCAATGAGGAT |
|                            | Reverse               | CCTCGTTATCCCATGTGTCG     |
| mCxcl1                     | Forward               | GCACCCAAACCGAAGTCA       |
|                            | Reverse               | AAGCCAGCGTTCACCAGA       |
| hCxcl1                     | Forward               | CCAAACCGAAGTCATAGCC      |
|                            | Reverse               | TTCTCTCCCTTCTGGTC        |
| mIFN $\gamma$              | Forward               | AGCAACAACATAAGCGTCAT     |
|                            | Reverse               | CCTCAAACCTTGGCAATACTC    |
| GAPDH                      | Forward               | GGAGCGAGATCCCTCCAAAAT    |
|                            | Reverse               | GGCTGTTGTCATACTTCTCATGG  |
| hCxcl1-E <sub>2</sub> box1 | Forward               | GGGGTAGAAACGGAGAGGCT     |
|                            | Reverse               | GCCCAGCTCAATAGGTAAGA     |
| hCxcl1-E <sub>2</sub> box2 | Forward               | CCTTCTCCGTTCCAGCCCC      |
|                            | Reverse               | CGCCTTCTGCCCCAGATCCC     |
| shZeb1-1                   | CGGCGCAATAACGTTACAAAT |                          |
| shZeb1-2                   | GGCGCAATAACGTTACAAA   |                          |

## Involvement of Zeb1-Cxcl1 axis in breast cancer immune escape

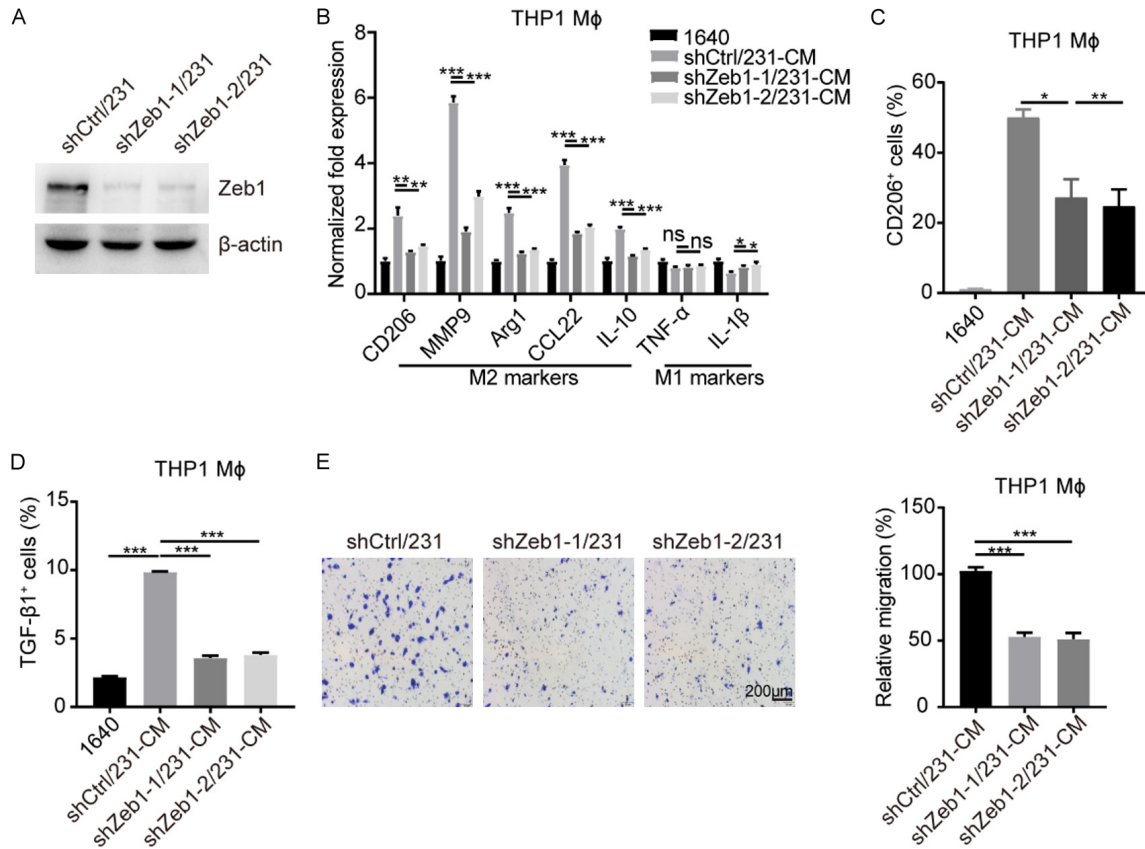

**Figure S1.** (A) Western blotting of Zeb1 expression in Zeb1-interfered MDA-MB-231 cells. (B) Relative mRNA levels of M1- and M2-TAM markers in THP1 macrophages treated with CM from Zeb1-interfered MDA-MB-231 cells. (C, D) Flow cytometry analysis of CD206<sup>+</sup> (C) and TGF-β1<sup>+</sup> (D) cells in THP1 macrophages treated with CM from Zeb1-interfered MDA-MB-231 cells. (E) Transwell migration assay in THP1 macrophages treated with CM from Zeb1-interfered MDA-MB-231 cells. Indicated *P*-values were calculated using two-tailed unpaired Student's *t*-test. Data are presented as mean ± SEM in (A-E). Data are representative of three (A-E) independent experiments. Source data are provided as a Source Data file.

## Involvement of Zeb1-Cxcl1 axis in breast cancer immune escape

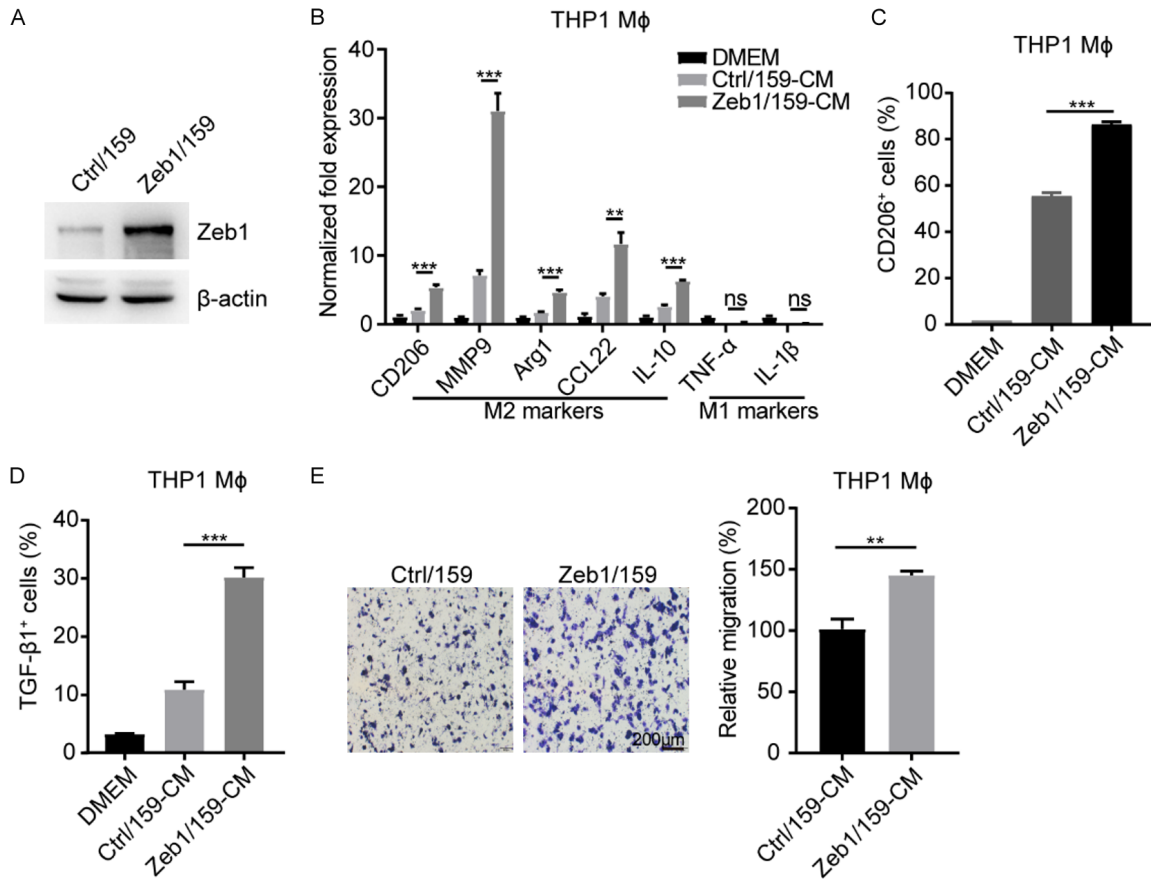

**Figure S2.** (A) Western blotting of Zeb1 expression in Zeb1-expressing SUM-159 cells. (B) Relative mRNA levels of M1- and M2-TAM markers in THP1 macrophages treated with CM from Zeb1-expressing SUM-159 cells. (C, D) Flow cytometry analysis of (C) CD206<sup>+</sup> and (D) TGF- $\beta$ 1<sup>+</sup> cells in THP1 macrophages treated with CM from Zeb1-expressing SUM-159 cells. (E) Transwell migration assay in THP1 macrophages treated with CM from Zeb1-expressing SUM-159 cells. Indicated *P*-values were calculated using two-tailed unpaired Student's *t*-test. Data are presented as mean  $\pm$  SEM in (A-E). Data are representative of three (A-E) independent experiments. Source data are provided as a Source Data file.

## Involvement of Zeb1-Cxcl1 axis in breast cancer immune escape

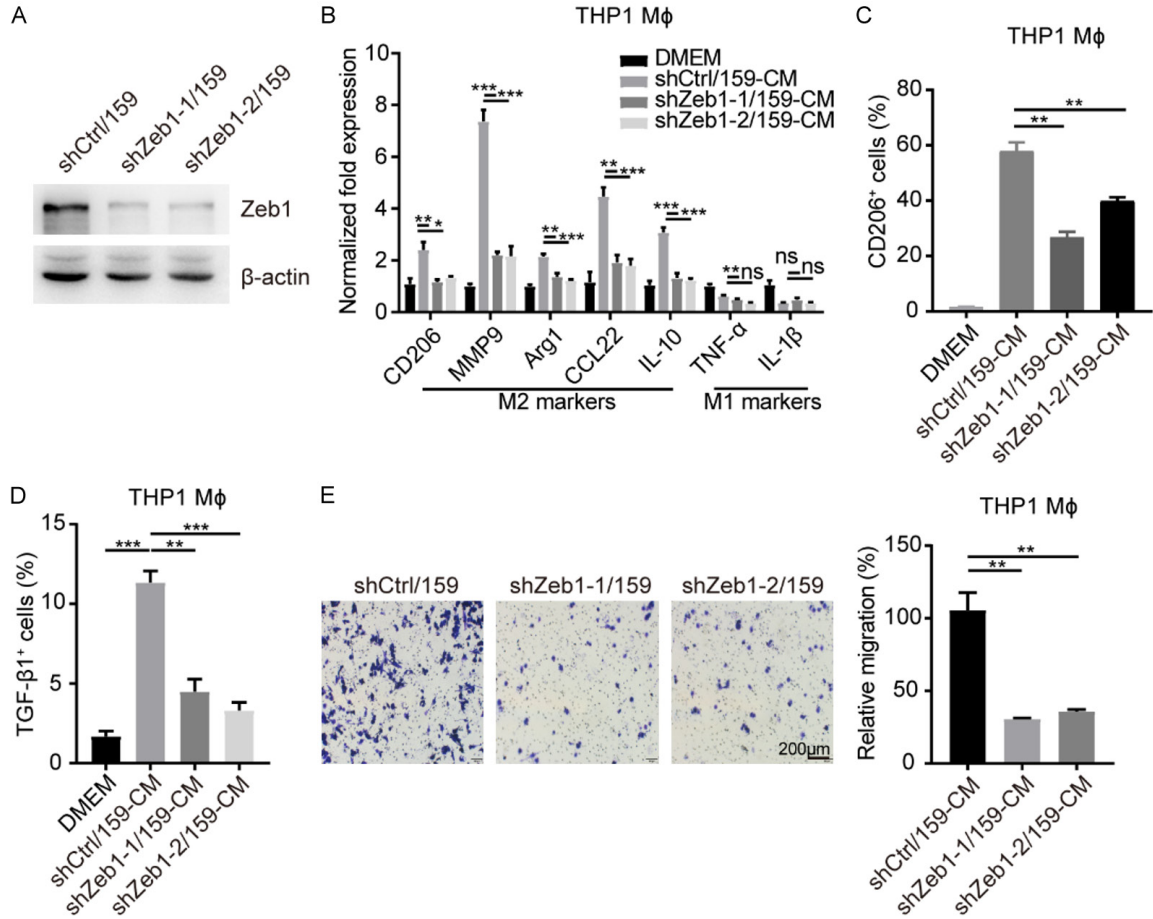

**Figure S3.** (A) Western blotting of Zeb1 expression in Zeb1-interfered SUM-159 cells. (B) Relative mRNA levels of M1- and M2-TAM markers in THP1 macrophages treated with CM from Zeb1-interfered SUM-159 cells. (C, D) Flow cytometry analysis of (C) CD206<sup>+</sup> and (D) TGF-β1<sup>+</sup> cells in THP1 macrophages treated with CM from Zeb1-interfered SUM-159 cells. (E) Transwell migration assay in THP1 macrophages treated with CM from Zeb1-interfered SUM-159 cells. Indicated *P*-values were calculated using two-tailed unpaired Student's *t*-test. Data are presented as mean ± SEM in (A-E). Data are representative of three (A-E) independent experiments. Source data are provided as a Source Data file.

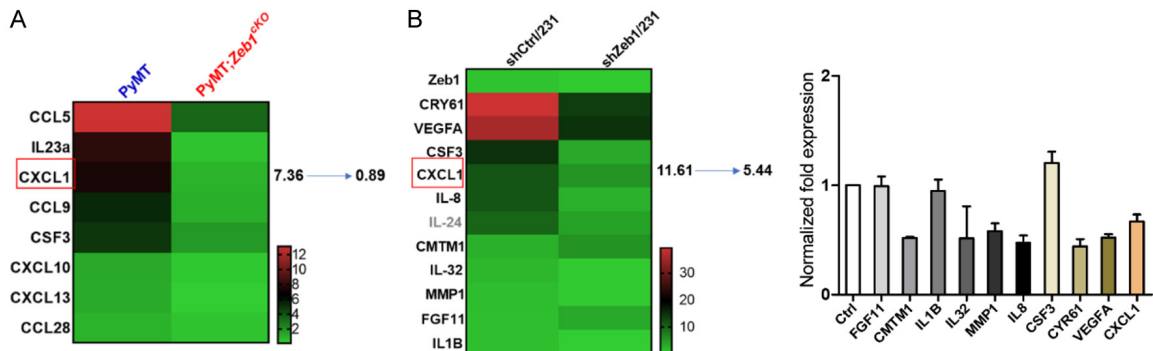

**Figure S4.** (A, B) RNA sequencing analysis of paracrine factors expressed in the indicated breast cancer tissues (A) and Zeb1-interfered MDA-MB-231 cells (B). Source data are provided as a Source Data file.

## Involvement of Zeb1-Cxcl1 axis in breast cancer immune escape

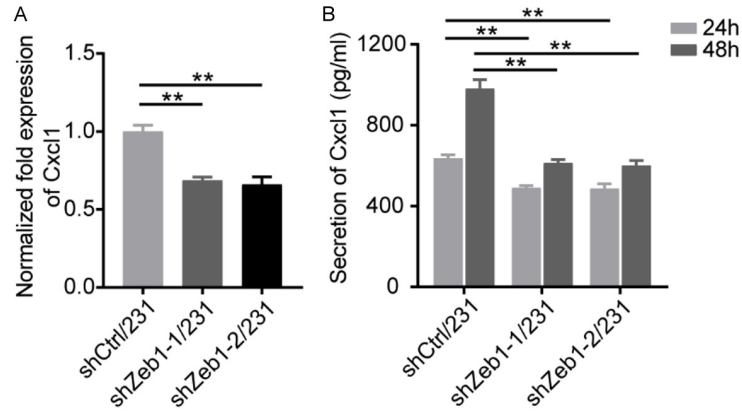

**Figure S5.** (A) Relative mRNA levels of Cxcl1 in Zeb1-interfered MDA-MB-231 cells. (B) ELISA analysis of Cxcl1 concentration in CM from Zeb1-interfered MDA-MB-231 cells. Indicated *P*-values were calculated using two-tailed unpaired Student's *t*-test. Data are presented as mean  $\pm$  SEM in (A, B). Data are representative of three (A, B) independent experiments. Source data are provided as a Source Data file.

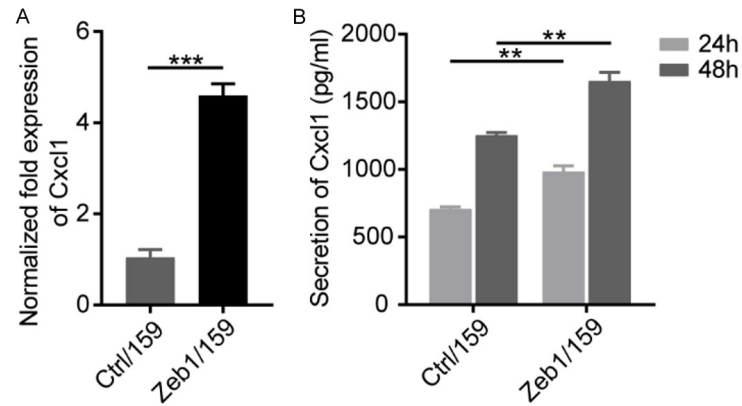

**Figure S6.** (A) Relative mRNA levels of Cxcl1 in Zeb1-expressing SUM-159 cells. (B) ELISA analysis of Cxcl1 concentration in CM from Zeb1-expressing SUM-159 cells. Indicated *P*-values were calculated using two-tailed unpaired Student's *t*-test. Data are presented as mean  $\pm$  SEM in (A, B). Data are representative of three (A, B) independent experiments. Source data are provided as a Source Data file.

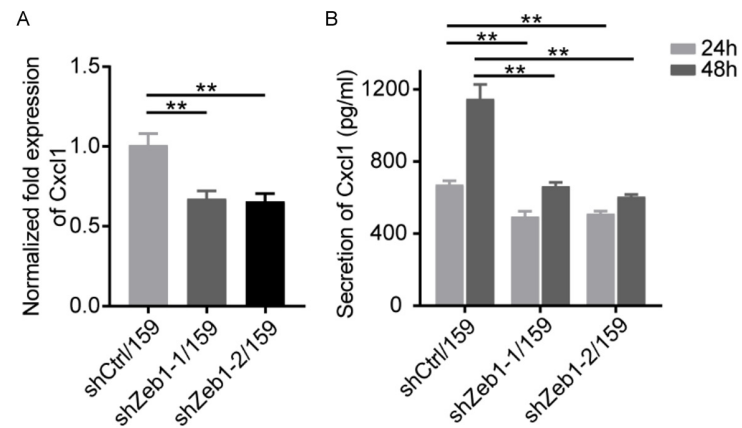

**Figure S7.** (A) Relative mRNA levels of Cxcl1 in Zeb1-interfered SUM-159 cells. (B) ELISA analysis of Cxcl1 concentration in CM from Zeb1-interfered SUM-159 cells. Indicated *P*-values were calculated using two-tailed unpaired Student's *t*-test. Data are presented as mean  $\pm$  SEM in (A, B). Data are representative of three (A, B) independent experiments. Source data are provided as a Source Data file.

## Involvement of Zeb1-Cxcl1 axis in breast cancer immune escape

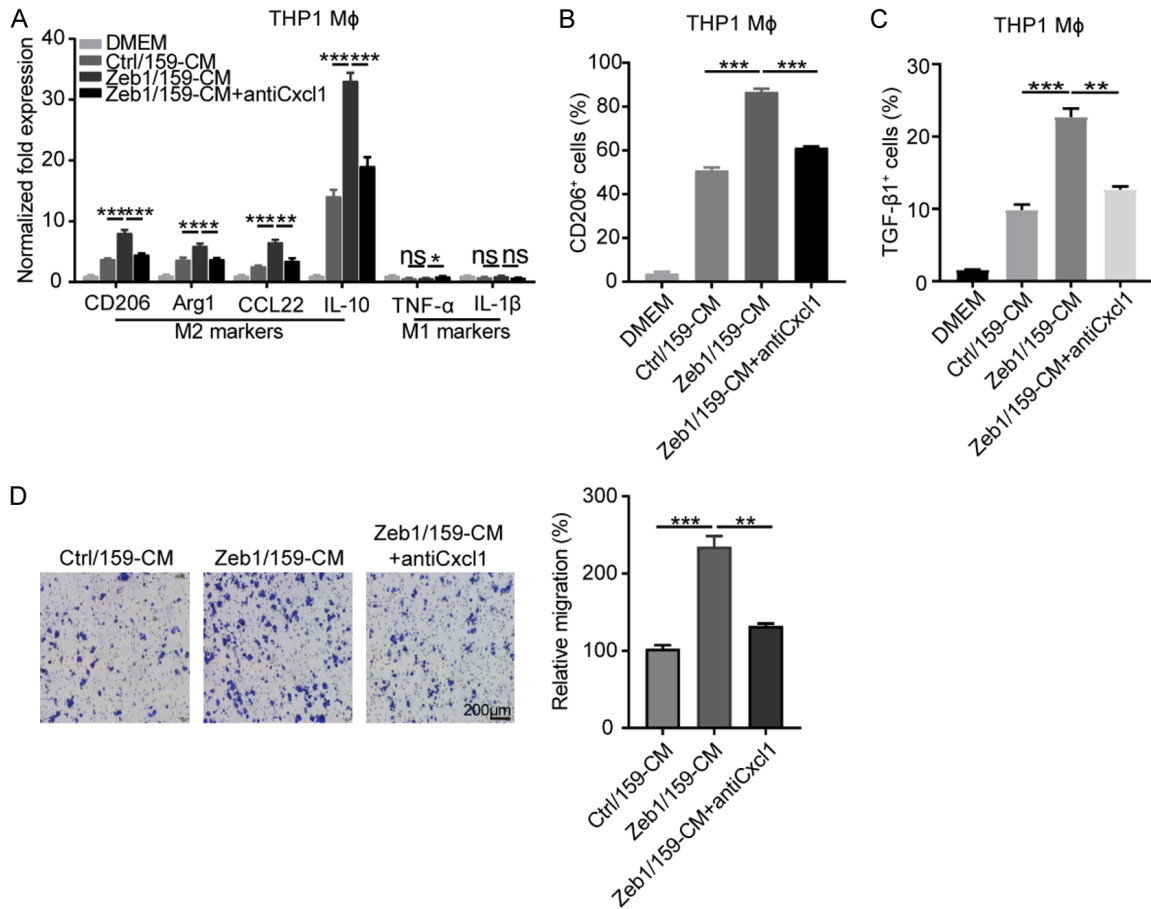

**Figure S8.** (A) Relative mRNA levels of M1- and M2-TAM markers in THP1 macrophages treated with CM from Zeb1-expressing SUM-159 cells in the presence of a Cxcl1 neutralizing antibody. (B, C) Flow cytometry analysis of CD206<sup>+</sup> (B) and TGF- $\beta$ 1<sup>+</sup> (C) cells in THP1 macrophages treated with CM from Zeb1-expressing SUM-159 cells in the presence of a Cxcl1 neutralizing antibody. (D) Transwell migration assay in THP1 macrophages treated with CM from Zeb1-expressing SUM-159 cells in the presence of a Cxcl1 neutralizing antibody. Indicated *P*-values were calculated using two-tailed unpaired Student's *t*-test. Data are presented as mean  $\pm$  SEM in (A-D). Data are representative of three (A-D) independent experiments. Source data are provided as a Source Data file.
